# Supplementary material for: Introducing spatial availability, a singly-constrained measure of competitive accessibility
Source: PubMed Central journal article supplement (PMC9858359; doi:10.1371/journal.pone.0278468), 2023-01-20
Supplement: pone.0278468.s001.pdf [file pone.0278468.s001.pdf]

## Appendix A for: Introducing spatial availability, a singly-constrained measure of competitive accessibility

Anastasia Soukhov <sup>1</sup> \*, Antonio Páez <sup>1</sup> , Christopher D. Higgins <sup>2</sup> , Moataz Mohamed <sup>3</sup>

**1** School of Earth, Environment and Society, McMaster University, Hamilton, ON, L8S 4K1, Canada

**2** Department of Geography & Planning, University of Toronto Scarborough, 1265 Military Trail, Toronto, ON M1C 1A4

**3** Department of Civil Engineering, McMaster University, Hamilton, ON, L8S 4K1, Canada

\* Corresponding author: soukhoa@mcmaster.ca

## Appendix A

In this appendix, we solve for spatial availability per capita ( $v_i$ ) for population center  $A$  (Shen's synthetic example as discussed in Section 2.3) to demonstrate its mathematical equivalence to the Shen-type accessibility measure ( $a_i$ ). The demonstration is shown in the following four steps.

**First step:** the population-based balancing factor  $F_i^p$  used in  $V_i$  is defined as:

$$F_i^p = \frac{P_i^\alpha}{\sum_i^N P_i^\alpha}$$

For population center  $A$ ,  $F_i^p$  is equal to:

$$F_A^p = \frac{P_A^\alpha}{P_A^\alpha + P_B^\alpha + P_C^\alpha}$$

**Second step:** the impedance-based balancing factor  $F_{ij}^c$  in  $V_i$  is defined as:

$$F_{ij}^c = \frac{f(c_{ij})}{\sum_{i=A}^N f(c_{ij})}$$

In this synthetic example, combinations of workers from population center  $A$  are permitted to go to all employment centers (1, 2, 3), so their relative impedance value is experienced in all of the nine OD trip combinations. Therefore, all nine  $F_{ij}^c$  are computed as follows, since they all consider the impact of population center  $A$  trip combinations (i.e., either  $A1$ ,  $A2$ ,  $A3$ ).

$$F_{A1}^c = \frac{f(c_{A1})}{f(c_{A1}) + f(c_{B1}) + f(c_{C1})}$$

$$F_{B1}^c = \frac{f(c_{B1})}{f(c_{A1}) + f(c_{B1}) + f(c_{C1})}$$

$$F_{C1}^c = \frac{f(c_{C1})}{f(c_{A1}) + f(c_{B1}) + f(c_{C1})}$$

$$F_{A2}^c = \frac{f(c_{A2})}{f(c_{A2}) + f(c_{B2}) + f(c_{C2})}$$

$$F_{B2}^c = \frac{f(c_{B2})}{f(c_{A2}) + f(c_{B2}) + f(c_{C2})}$$

$$F_{C2}^c = \frac{f(c_{C2})}{f(c_{A2}) + f(c_{B2}) + f(c_{C2})}$$

$$F_{A3}^c = \frac{f(c_{A3})}{f(c_{A3}) + f(c_{B3}) + f(c_{C3})}$$

$$F_{B3}^c = \frac{f(c_{B3})}{f(c_{A3}) + f(c_{B3}) + f(c_{C3})}$$

$$F_{C3}^c = \frac{f(c_{C3})}{f(c_{A3}) + f(c_{B3}) + f(c_{C3})}$$

**Third step:** when the balancing factors ( $F_i^p$  and  $F_{ij}^c$ ) concerning population center  $A$  are assembled and divided by  $P_i$ , the denominators of the denominators cancel out. The following equation is the assigned general form, with the strike-through indicating which values cancel out:

$$v_i = \sum_j \frac{O_j}{P_i^\alpha} \frac{\cancel{\sum_i^N P_i^\alpha} \cdot \frac{f(c_{ij})}{\cancel{\sum_i^N f(c_{ij})}}}{\sum_i^N \frac{\cancel{P_i^\alpha}}{\cancel{\sum_i^N P_i^\alpha}} \cdot \frac{f(c_{ij})}{\cancel{\sum_i^N f(c_{ij})}}}$$

To demonstrate that the strike-through terms cancel out, the following following terms for  $v_A$  are subbed into the general form:

$$v_A = \frac{O_1}{P_A^\alpha} \left( \frac{\frac{P_A^\alpha}{P_A^\alpha + P_B^\alpha + P_C^\alpha} \cdot \frac{f(c_{A1})}{f(c_{A1}) + f(c_{B1}) + f(c_{C1})}}{\frac{P_A^\alpha}{P_A^\alpha + P_B^\alpha + P_C^\alpha} \cdot \frac{f(c_{A1})}{f(c_{A1}) + f(c_{B1}) + f(c_{C1})} + \frac{P_A^\alpha}{P_A^\alpha + P_B^\alpha + P_C^\alpha} \cdot \frac{f(c_{B1})}{f(c_{A1}) + f(c_{B1}) + f(c_{C1})} + \frac{P_A^\alpha}{P_A^\alpha + P_B^\alpha + P_C^\alpha} \cdot \frac{f(c_{C1})}{f(c_{A1}) + f(c_{B1}) + f(c_{C1})}} \right) +$$

$$\frac{O_2}{P_A^\alpha} \left( \frac{\frac{P_A^\alpha}{P_A^\alpha + P_B^\alpha + P_C^\alpha} \cdot \frac{f(c_{A2})}{f(c_{A2}) + f(c_{B2}) + f(c_{C2})}}{\frac{P_A^\alpha}{P_A^\alpha + P_B^\alpha + P_C^\alpha} \cdot \frac{f(c_{A2})}{f(c_{A2}) + f(c_{B2}) + f(c_{C2})} + \frac{P_A^\alpha}{P_A^\alpha + P_B^\alpha + P_C^\alpha} \cdot \frac{f(c_{B2})}{f(c_{A2}) + f(c_{B2}) + f(c_{C2})} + \frac{P_A^\alpha}{P_A^\alpha + P_B^\alpha + P_C^\alpha} \cdot \frac{f(c_{C2})}{f(c_{A2}) + f(c_{B2}) + f(c_{C2})}} \right) +$$

$$\frac{O_3}{P_A^\alpha} \left( \frac{\frac{P_A^\alpha}{P_A^\alpha + P_B^\alpha + P_C^\alpha} \cdot \frac{f(c_{A3})}{f(c_{A3}) + f(c_{B3}) + f(c_{C3})}}{\frac{P_A^\alpha}{P_A^\alpha + P_B^\alpha + P_C^\alpha} \cdot \frac{f(c_{A3})}{f(c_{A3}) + f(c_{B3}) + f(c_{C3})} + \frac{P_A^\alpha}{P_A^\alpha + P_B^\alpha + P_C^\alpha} \cdot \frac{f(c_{B3})}{f(c_{A3}) + f(c_{B3}) + f(c_{C3})} + \frac{P_A^\alpha}{P_A^\alpha + P_B^\alpha + P_C^\alpha} \cdot \frac{f(c_{C3})}{f(c_{A3}) + f(c_{B3}) + f(c_{C3})}} \right)$$

$v_A$  simplifies to the following:

$$v_A = \frac{O_1}{P_A^\alpha} \left( \frac{\frac{P_A^\alpha}{P_A^\alpha + P_B^\alpha + P_C^\alpha} \cdot \frac{f(c_{A1})}{f(c_{A1}) + f(c_{B1}) + f(c_{C1})}}{\frac{P_A^\alpha \cdot f(c_{A1}) + P_A^\alpha \cdot f(c_{B1}) + P_A^\alpha \cdot f(c_{C1})}{(P_A^\alpha + P_B^\alpha + P_C^\alpha) \cdot (f(c_{A1}) + f(c_{B1}) + f(c_{C1}))}} \right) + \frac{O_2}{P_A^\alpha} \left( \frac{\frac{P_A^\alpha}{P_A^\alpha + P_B^\alpha + P_C^\alpha} \cdot \frac{f(c_{A2})}{f(c_{A2}) + f(c_{B2}) + f(c_{C2})}}{\frac{P_A^\alpha \cdot f(c_{A2}) + P_A^\alpha \cdot f(c_{B2}) + P_A^\alpha \cdot f(c_{C2})}{(P_A^\alpha + P_B^\alpha + P_C^\alpha) \cdot (f(c_{A2}) + f(c_{B2}) + f(c_{C2}))}} \right) + \frac{O_3}{P_A^\alpha} \left( \frac{\frac{P_A^\alpha}{P_A^\alpha + P_B^\alpha + P_C^\alpha} \cdot \frac{f(c_{A3})}{f(c_{A3}) + f(c_{B3}) + f(c_{C3})}}{\frac{P_A^\alpha \cdot f(c_{A3}) + P_A^\alpha \cdot f(c_{B3}) + P_A^\alpha \cdot f(c_{C3})}{(P_A^\alpha + P_B^\alpha + P_C^\alpha) \cdot (f(c_{A3}) + f(c_{B3}) + f(c_{C3}))}} \right)$$

Notice, the denominator of the denominator is the same as the denominator of the numerator for each  $j$  ( $j=1, j=2$ , and  $j=3$ ). Now, we remove those strike-through terms (as indicated at the beginning of this step) and re-write  $v_a$  as follows:

$$v_A = \frac{O_1}{P_A^\alpha} \left( \frac{P_A^\alpha \cdot f(c_{A1})}{P_A^\alpha \cdot f(c_{A1}) + P_A^\alpha \cdot f(c_{B1}) + P_A^\alpha \cdot f(c_{C1})} \right) + \frac{O_2}{P_A^\alpha} \left( \frac{P_A^\alpha \cdot f(c_{A2})}{P_A^\alpha \cdot f(c_{A2}) + P_A^\alpha \cdot f(c_{B2}) + P_A^\alpha \cdot f(c_{C2})} \right) + \frac{O_3}{P_A^\alpha} \left( \frac{P_A^\alpha \cdot f(c_{A3})}{P_A^\alpha \cdot f(c_{A3}) + P_A^\alpha \cdot f(c_{B3}) + P_A^\alpha \cdot f(c_{C3})} \right)$$

**Fourth step:** We can now cancel out one more term,  $P_A^\alpha$  as follows:

$$v_A = \frac{O_1}{\cancel{P_A^\alpha}} \left( \frac{\cancel{P_A^\alpha} \cdot f(c_{A1})}{P_A^\alpha \cdot f(c_{A1}) + P_A^\alpha \cdot f(c_{B1}) + P_A^\alpha \cdot f(c_{C1})} \right) + \frac{O_2}{\cancel{P_A^\alpha}} \left( \frac{\cancel{P_A^\alpha} \cdot f(c_{A2})}{P_A^\alpha \cdot f(c_{A2}) + P_A^\alpha \cdot f(c_{B2}) + P_A^\alpha \cdot f(c_{C2})} \right) + \frac{O_3}{\cancel{P_A^\alpha}} \left( \frac{\cancel{P_A^\alpha} \cdot f(c_{A3})}{P_A^\alpha \cdot f(c_{A3}) + P_A^\alpha \cdot f(c_{B3}) + P_A^\alpha \cdot f(c_{C3})} \right)$$

Which can be expressed as:

$$v_A = \left( \frac{O_1 \cdot f(c_{A1})}{P_A^\alpha \cdot f(c_{A1}) + P_B^\alpha \cdot f(c_{B1}) + P_C^\alpha \cdot f(c_{C1})} \right) + \left( \frac{O_2 \cdot f(c_{A2})}{P_A^\alpha \cdot f(c_{A2}) + P_B^\alpha \cdot f(c_{B2}) + P_C^\alpha \cdot f(c_{C2})} \right) + \left( \frac{O_3 \cdot f(c_{A3})}{P_A^\alpha \cdot f(c_{A3}) + P_B^\alpha \cdot f(c_{B3}) + P_C^\alpha \cdot f(c_{C3})} \right)$$

And generalized to be formally identical to the Shen-type accessibility measure with competition as follows:

$$v_i = a_i = \sum_j \frac{O_j \cdot f(c_{ij})}{\sum_i P_i \cdot f(c_{ij})}$$

\end{landscape}
